# Supplementary material for: ZnO thin film-nanowire array homo-structures with tunable photoluminescence and optical band gap
Source: Royal Society of Chemistry journal article supplement (doi:10.1039/d0ra04524a), 2020-01-01
Supplement: d0ra04524a1.pdf [file d0ra04524a1.pdf]

Supplementary information

## ZnO thin film-nanowire array homo-structures with tunable photoluminescence and optical band gap

Yalambaku Rajesh,<sup>a</sup> Santanu K Padhi<sup>b</sup> and M Ghanashyam Krishna

<sup>a</sup> School of Physics, University of Hyderabad, Hyderabad-500046, Telangana, India.

<sup>b</sup> ACRHEM, School of Physics, University of Hyderabad, Hyderabad-500046, Telangana, India.

<sup>c</sup> Centre for Advanced Studies in Electronics Science and Technology, School of Physics, University of Hyderabad, Hyderabad-500046, Telangana, India.

\*Email: [mgksp@uohyd.ernet.in](mailto:mgksp@uohyd.ernet.in)

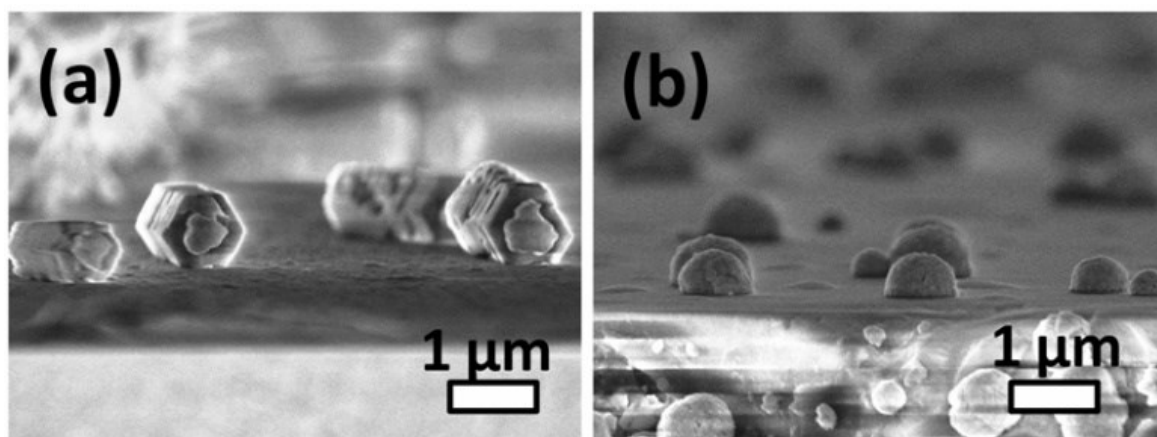

**Fig.S1** Scanning electron microscope images showing the effect of (a) NaOH and (b)  $\text{NH}_3$  precursor on the growth of hydrothermally processed ZnO clearly demonstrating the lack of nanowire formation.

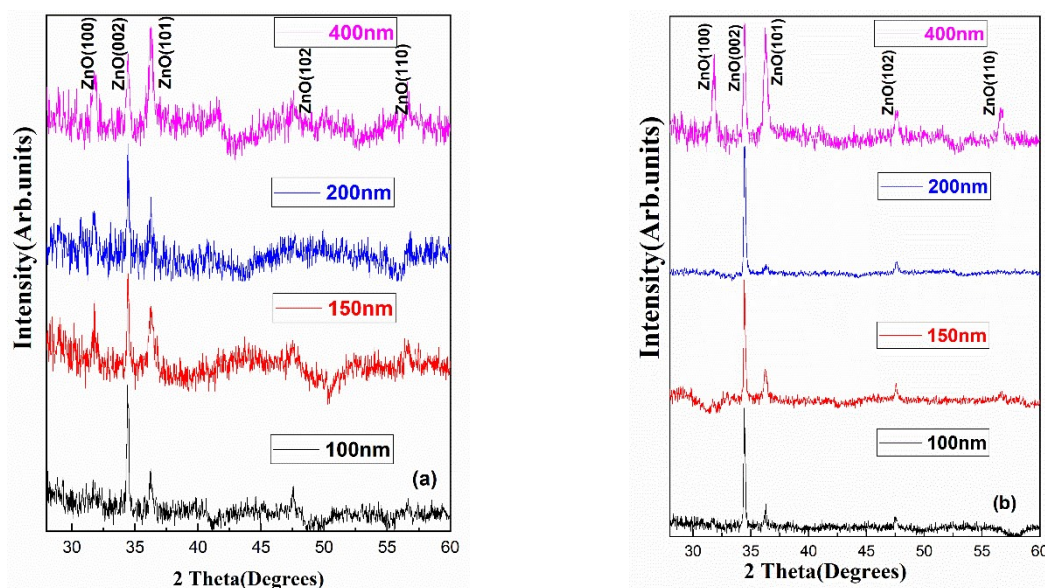

**Fig.S2** X-ray diffraction patterns of hydrothermally processed ZnO at  $120^\circ\text{C}$  for (a) 10 min and (b) 1 hr on ZnO thin films of different thickness as indicated.

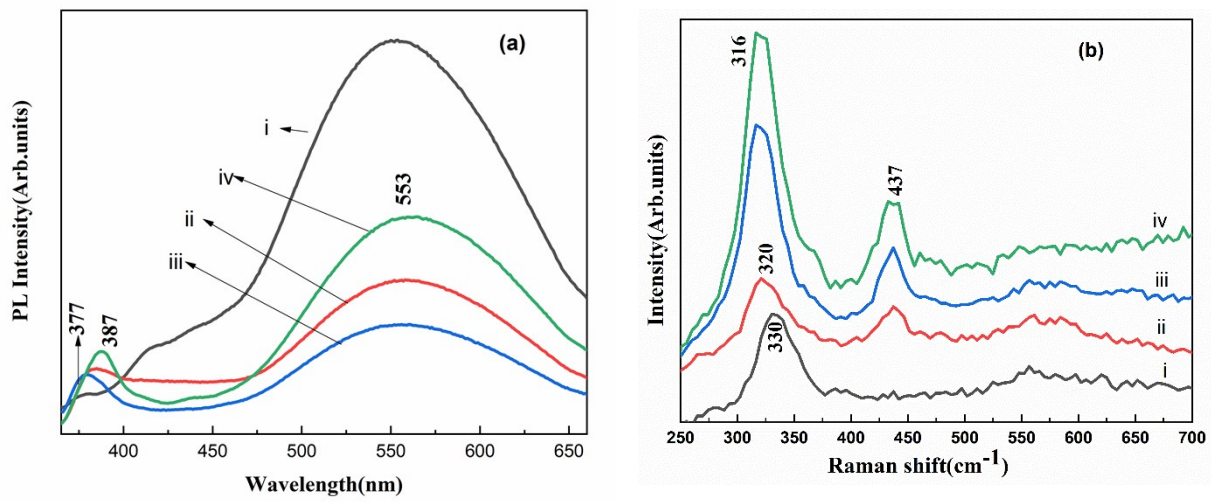

**Fig. S3** Effect of thickness of ZnO films on the (a) photoluminescence, (b) Raman spectra i=100 nm; ii=150 nm; iii=200 nm; iv=400 nm.
